# Supplementary material for: Physical and Linkage Maps for Drosophila serrata, a Model Species for Studies of Clinal Adaptation and Sexual Selection
Source: PubMed Central journal article supplement (PMC3284336; doi:10.1534/g3.111.001354), 2012-02-01
Supplement: supp_2.2.287_001354SI.pdf [file supp_2.2.287_001354SI.pdf]

**Table S1 Comparative Gene Locations in *D. melanogaster* and *D. serrata*****Chromosome X (Muller element A)**

| Gene                                                  | Dm Flybase code  | <i>D. mel</i> location | <i>D. serrata</i> location |
|-------------------------------------------------------|------------------|------------------------|----------------------------|
| SNP s55<br>stubarista (sta)                           | CG14792          | X2B1                   | X2B                        |
| Ds CL472Contig1<br>protein coding gene                | CG8128           | X13E7-8                | X5A                        |
| ATP7                                                  | CG1886           | X10F1-2                | X5B                        |
| lethal(1) G0196<br>(l(1) G0196)                       | CG14616          | X20C1                  | X5D (~same as stn A)       |
| stoned A (stn A)                                      | CG12500          | X20F3                  | X5D (prox to 14616)        |
| <b>Actin (Act5C)</b>                                  | <b>CG4027</b>    | <b>X5C7</b>            | <b>X6C</b>                 |
| SNP s33<br>yolkless (yl)                              | CG1372           | X12E3                  | X7A                        |
| Ds CL1017Contig1<br>CHOp24                            | CG3564           | X4C7                   | X8D                        |
| Ds CL49Contig1<br>Autophagy specif<br>Gene 8a (Atg8a) | CG32672          | X9E6-7                 | X11E                       |
| SNP s29<br>protein coding gene                        | CG14235          | X18E5                  | X12C                       |
| Ds CL0Est<br>annexin (AnnX)<br>white (w)              | CG9579<br>CG2759 | X19C1<br>X3B6          | X14B<br>X15A(from pUAST)   |

**Chromosome Dm 2L (Muller element B)**

| Gene                                                           | Dm Flybase code | Dm Location | Ds location |
|----------------------------------------------------------------|-----------------|-------------|-------------|
| Ds Clone4994573C12<br>protein coding gene                      | CG17633         | 2L~30C8     | 2L24A       |
| synthesis of cyto-<br>chrome c oxidase (sco1)                  | CG8885          | 2L25B5      | 2L25A       |
| synaptotagmin1<br>(Syt 1)                                      | CG3139          | 2L23A6-B1   | 2L25C       |
| SNP s53<br>Glycerol-3-phosphate<br>dehydrogenase (Gpdh)        | CG9042          | 2L26A3      | 2L26A       |
| Ds Clone4952873C05<br>Imaginal disc growth<br>factor 1 (Idgf1) | CG4472          | 2L36A1      | 2L33C       |

|                                                                         |         |        |       |
|-------------------------------------------------------------------------|---------|--------|-------|
| donut (dnt)                                                             | CG17559 | 2L37D2 | 2L35B |
| Ds Clone4982073E19<br>Larval serum protein<br>1 $\beta$ (Lsp1 $\beta$ ) | CG4178  | 2L21E2 | 2L35C |
| SNP s56<br>Eukaryote initiation factor<br>4a (eIF-4a)                   | CG9075  | 2L26B2 | 2L36B |
| black (b)                                                               | CG7811  | 2L34D1 | 2L39C |

### Chromosome 2R (Muller element C)

| Gene                                                         | Dm Flybase code | Dm Location     | Ds location           |
|--------------------------------------------------------------|-----------------|-----------------|-----------------------|
| <b>Actin (Act42A)</b>                                        | <b>CG12051</b>  | <b>2R42A7</b>   | <b>2R41A</b>          |
| Ds CL589Contig1<br>Heat shock protein<br>cognate 5 (Hsc70-5) | CG8542          | 2R50E6          | 2R44B                 |
| protein coding gene                                          | CG8740          | 2R44E3-4        | 2R44B                 |
| SNP s4 $\beta$ tubulin 60D*<br>( $\beta$ Tub60D)             | CG3401          | 2R60C6          | 2R45A                 |
| SNP s52 Muscle<br>protein 20 (Mp20)                          | CG4696          | 2R49F13         | 2R45A                 |
| Ds CL1086Contig1<br>protein coding gene                      | CG8736          | 2R44D4          | 2R45C                 |
| Ribosomal protein<br>LP2 (RplP2)                             | CG4918          | 2R53C9          | 2R46A                 |
| <b><math>\beta</math> tubulin (<math>\beta</math>Tub56D)</b> | <b>CG9277</b>   | <b>2R56D7-8</b> | <b>2R47B</b>          |
| trplike (trpl)                                               | CG18345         | 2R46B2          | 2R48B                 |
| even skipped (eve)                                           | CG2328          | 2R46C10         | 2R49A                 |
| <b>Actin (Act57B)</b>                                        | <b>CG10067</b>  | <b>2R57B5</b>   | <b>2R50B</b>          |
| morula (mr)                                                  | CG3060          | 2R60A4          | 2R53A                 |
| Ds CL388Contig1<br>protein coding gene                       | CG4019          | 2R59F4          | 2R56C                 |
| engrailed (en)                                               | CG9015          | 2R47F17         | 2R57C                 |
| Ds CL1069Contig1<br>Trehalose transporter 1-1<br>Tret1-1     | CG30035         | 2R48B6-7        | 2R57D                 |
| Ds CL1004Contig1<br>protein coding gene                      | CG12736         | 2R43D1          | 2R59A                 |
| kruppel (kr)                                                 | CG3340          | 2R60F6          | 2R60C (near telomere) |

**Chromosome 3L (Muller element D)**

| Gene                                               | Dm Flybase code | Dm Location       | Ds location  |
|----------------------------------------------------|-----------------|-------------------|--------------|
| protein coding gene                                | CG7376          | 3L65A5            | 3L61C        |
| <i>ecdy. induced prot. (Eip74EF)</i>               | <i>CG32180</i>  | <i>3L74D4-E2</i>  | <i>3L62B</i> |
| SNP s26, Catalase (Cat)                            | CG6871          | 3L75E1            | 3L62C        |
| Ds CL230(203?)Contig1 protein coding gene          | CG3819          | 3L75E6            | 3L63B        |
| Ds CL159Contig1, UDP-galactose 4'-epimerase (Gale) | CG12030         | 3L61C8            | 3L65A        |
| Ds CL265Contig1 protein coding gene                | CG14997         | 3L64A10           | 3L65C        |
| <i>ecdy. induced prot. (Eip75B)</i>                | <i>CG8127</i>   | <i>3L75A10-B6</i> | <i>3L67C</i> |
| <i>heat shock prot. 83 (Hsp83)</i>                 | <i>CG1242</i>   | <i>3L63B11</i>    | <i>3L68D</i> |
| knirps (kni)                                       | CG4717          | 3L77E3            | 3L71B        |
| <i>Actin (Act79B)</i>                              | <i>CG7478</i>   | <i>3L79B</i>      | <i>3L72</i>  |
| SNP s47, ATP synthase, subunit b ATPsyn-b          | CG8189          | 3L67C5            | 3L74C        |
| <i>eukar init. Factor 4E (eIF-4E)</i>              | <i>CG4035</i>   | <i>3L67B4</i>     | <i>3L75B</i> |
| Ds CL231Contig1 Astray (aay)                       | CG3705          | 3L67B5            | 3L75C        |
| <i>α tubulin (αTub67C)</i>                         | <i>CG8308</i>   | <i>3L67C4</i>     | <i>3L75C</i> |
| Ds CL920Contig1 tumor sup prot 101 (TSG101)        | CG9712          | 3L73D1            | 3L76A        |

**Chromosome 3R (Muller element E)**

| Gene                                | Dm Flybase code | Dm Location  | Ds location |
|-------------------------------------|-----------------|--------------|-------------|
| Ds CL0EstAφ4 Regena (Rga)           | CG2161          | 3R83B5-6     | 3R81A       |
| Senescence marker prot. 30 (smp-30) | CG7390          | 3R88D2       | 3R82D       |
| <i>Actin (Act88F)</i>               | <i>CG5178</i>   | <i>3R88F</i> | <i>3R83</i> |
| hunchback (hb)                      | CG9786          | 3R85A5       | 3R83D       |

|                                                  |                          |                     |                        |
|--------------------------------------------------|--------------------------|---------------------|------------------------|
| $\alpha$ tubulin ( $\alpha$ Tub85E)              | CG9476                   | 3R85E6              | 3R84A                  |
| Heat shock RNAw (Hsrw)                           | CR31400                  | 3R93D4              | 3R84A                  |
| SNP s20, Ribosomal Protein L4 (RpL4)             | CG5502                   | 3R98B6              | 3R85B                  |
| Ds CL0EstO $\phi$ 3 Elongin B (Elongin-B)        | CG4204                   | 3R92F2              | 3R86A                  |
| Glutamate de-hydrogenase (Gdh)                   | CG5320                   | 3R95C13-D1          | 3R86C                  |
| Heat shock prot. 68 (Hsp68)                      | CG5436                   | 3R95D11             | 3R86                   |
| Antennapedia (Antp)                              | CG1028                   | 3R84A6              | 3R87C                  |
| $\alpha$ tubulin ( $\alpha$ Tub84B)              | CG1913                   | 3R84B2              | 3R87D                  |
| $\alpha$ tubulin ( $\alpha$ Tub84D)              | CG2512                   | 3R84D9              | 3R87D                  |
| Actin (Act88F)                                   | CG5178                   | 3R88F               | 3R88                   |
| Ds CL533Contig1 myosin alk lite ch (Mlc1)        | CG5596                   | 3R98A14-15          | 3R89C                  |
| $\beta$ tubulin ( $\beta$ Tub85D)                | CG9359                   | 3R85D15             | 3R92                   |
| transient receptor potential (trp)               | CG7875                   | 3R99C6-G7           | 3R93A                  |
| $\beta$ tubulin ( $\beta$ Tub97EF)               | CG4869                   | 3R98B6-7            | 3R93                   |
| Heat shock prot. 70 (Hsp70)                      | 5, depends on probe used | 3R87A2-3/<br>B12-15 | 3R94                   |
| Actin (Act87E)                                   | CG18290                  | 3R87E               | 3R95D                  |
| globin1 (glob1)                                  | CG9734                   | 3R89A8              | 3R96A                  |
| Ds CL22Contig1 Aldolase (Ald)                    | CG6058                   | 3R97A6              | 3R96B                  |
| SNP s7, Ferritin 1 heavy chain homolog (Fer1HCH) | CG2216                   | 3R99F2              | 3R97B                  |
| Ribosomal protein L32 (rp49, RpL32)              | CG7939                   | 3R99D3              | 3R100D (near telomere) |

---

#### Chromosome 4 (Dm 4) (Muller element F)

---

| Gene                                  | Dm Flybase code | Dm Location | Ds location |
|---------------------------------------|-----------------|-------------|-------------|
| Plasma membrane Calcium ATPase (PMCA) | CG42314         | (4)102B     | (4)102A     |

---

Table S2

| Reciprocal cross |                           | CTN42 x FORS4 |    |    |    |         |          |       |     |    |    | FORS4 x CTN42 |          |       |    |    |         |         |          |       |     |    |    |         |          |       |
|------------------|---------------------------|---------------|----|----|----|---------|----------|-------|-----|----|----|---------------|----------|-------|----|----|---------|---------|----------|-------|-----|----|----|---------|----------|-------|
|                  |                           | Males         |    |    |    |         | Females  |       |     |    |    | Males         |          |       |    |    | Females |         |          |       |     |    |    |         |          |       |
| Sex              | <i>D. serrata</i> linkage | d.f.          | a  | h  | b  | missing | $\chi^2$ | p     | a   | h  | b  | missing       | $\chi^2$ | p     | a  | h  | b       | missing | $\chi^2$ | p     | a   | h  | b  | missing | $\chi^2$ | p     |
| s1               | X                         | 1             | 58 | 0  | 46 | 0       | 1.38     | 0.239 | 52  | 61 | 0  | 1             | 0.72     | 0.397 | 50 | 0  | 37      | 2       | 1.94     | 0.163 | 0   | 53 | 55 | 3       | 0.04     | 0.847 |
| s2               | X                         | 1             | 45 | 0  | 59 | 0       | 1.88     | 0.170 | 54  | 59 | 0  | 1             | 0.22     | 0.638 | 42 | 0  | 45      | 2       | 0.10     | 0.748 | 0   | 54 | 53 | 4       | 0.01     | 0.923 |
| s3               | 3                         | 2             | 47 | 42 | 15 | 0       | 23.54    | 0.000 | 40  | 55 | 18 | 1             | 8.65     | 0.013 | 32 | 45 | 10      | 2       | 11.23    | 0.004 | 33  | 60 | 17 | 1       | 5.56     | 0.062 |
| s4               | 2                         | 2             | 29 | 54 | 20 | 1       | 1.82     | 0.403 | 27  | 61 | 25 | 1             | 0.79     | 0.674 | 26 | 48 | 13      | 2       | 4.82     | 0.090 | 24  | 59 | 27 | 1       | 0.75     | 0.689 |
| s5               | 3                         | 2             | 24 | 51 | 23 | 6       | 0.18     | 0.912 | 20  | 51 | 35 | 7             | 4.40     | 0.111 | 18 | 42 | 23      | 6       | 0.61     | 0.735 | 12  | 50 | 34 | 15      | 10.25    | 0.006 |
| s6               | 2                         | 2             | 28 | 50 | 25 | 1       | 0.26     | 0.877 | 33  | 52 | 28 | 1             | 1.16     | 0.560 | 34 | 39 | 14      | 2       | 10.13    | 0.006 | 42  | 44 | 24 | 1       | 10.29    | 0.006 |
| s7               | 3                         | 2             | 49 | 43 | 11 | 1       | 30.84    | 0.000 | 33  | 62 | 18 | 1             | 5.05     | 0.080 | 45 | 37 | 5       | 2       | 38.72    | 0.000 | 54  | 48 | 8  | 1       | 40.25    | 0.000 |
| s8               | 2                         | 2             | 25 | 53 | 26 | 0       | 0.06     | 0.972 | 29  | 56 | 28 | 1             | 0.03     | 0.987 | 30 | 42 | 15      | 2       | 5.28     | 0.072 | 33  | 50 | 27 | 1       | 1.56     | 0.458 |
| s9               | 2                         | 2             | 72 | 26 | 6  | 0       | 109.77   | 0.000 | 75  | 34 | 4  | 1             | 107.14   | 0.000 | 47 | 32 | 8       | 2       | 41.05    | 0.000 | 51  | 47 | 12 | 1       | 29.98    | 0.000 |
| s10              | Invariant                 | 104           | 0  | 0  | 0  | 0       |          |       | 113 | 0  | 0  | 1             |          |       | 87 | 0  | 0       | 2       |          |       | 110 | 0  | 0  | 1       |          |       |
| s11              | 2                         | 2             | 78 | 25 | 1  | 0       | 142.06   | 0.000 | 93  | 20 | 0  | 1             | 200.24   | 0.000 | 72 | 15 | 0       | 2       | 156.52   | 0.000 | 85  | 25 | 0  | 1       | 164.09   | 0.000 |
| s12              | 2                         | 2             | 62 | 17 | 25 | 0       | 73.44    | 0.000 | 82  | 6  | 25 | 1             | 147.78   | 0.000 | 64 | 8  | 15      | 2       | 113.14   | 0.000 | 71  | 14 | 25 | 1       | 99.60    | 0.000 |
| s13              | 3                         | 2             | 28 | 51 | 19 | 6       | 1.82     | 0.403 | 20  | 62 | 22 | 9             | 3.92     | 0.141 | 15 | 38 | 26      | 10      | 3.18     | 0.204 | 22  | 45 | 26 | 18      | 0.44     | 0.802 |
| s14              | 3                         | 2             | 30 | 53 | 21 | 0       | 1.60     | 0.450 | 26  | 53 | 34 | 1             | 1.57     | 0.457 | 17 | 49 | 21      | 2       | 1.76     | 0.415 | 20  | 66 | 24 | 1       | 4.69     | 0.096 |
| s15              | 3                         | 2             | 66 | 17 | 18 | 3       | 90.07    | 0.000 | 62  | 17 | 32 | 3             | 69.63    | 0.000 | 54 | 15 | 13      | 7       | 73.98    | 0.000 | 68  | 11 | 29 | 3       | 96.65    | 0.000 |
| s16              | 2                         | 2             | 27 | 54 | 23 | 0       | 0.46     | 0.794 | 32  | 54 | 27 | 1             | 0.66     | 0.718 | 32 | 40 | 14      | 3       | 7.95     | 0.019 | 30  | 56 | 21 | 4       | 1.75     | 0.417 |
| s17              | 3                         | 2             | 28 | 56 | 20 | 0       | 1.85     | 0.397 | 21  | 61 | 31 | 1             | 2.49     | 0.288 | 15 | 49 | 23      | 2       | 2.86     | 0.239 | 22  | 65 | 23 | 1       | 3.65     | 0.161 |
| s18              | 2                         | 2             | 39 | 53 | 12 | 0       | 14.06    | 0.001 | 45  | 61 | 7  | 1             | 26.27    | 0.000 | 39 | 38 | 10      | 2       | 20.72    | 0.000 | 48  | 45 | 17 | 1       | 21.11    | 0.000 |
| s19              | 2                         | 2             | 33 | 48 | 23 | 0       | 2.54     | 0.281 | 24  | 63 | 26 | 1             | 1.57     | 0.457 | 32 | 42 | 13      | 2       | 8.40     | 0.015 | 30  | 55 | 25 | 1       | 0.45     | 0.797 |
| s20              | 3                         | 2             | 23 | 58 | 21 | 2       | 2.00     | 0.368 | 22  | 68 | 22 | 2             | 5.14     | 0.076 | 17 | 42 | 26      | 4       | 1.92     | 0.383 | 25  | 54 | 29 | 3       | 0.30     | 0.862 |
| s21              | 2                         | 2             | 36 | 50 | 18 | 0       | 6.38     | 0.041 | 40  | 54 | 19 | 1             | 8.03     | 0.018 | 39 | 40 | 8       | 2       | 22.66    | 0.000 | 48  | 50 | 12 | 1       | 24.47    | 0.000 |
| s22              | 3                         | 2             | 31 | 51 | 22 | 0       | 1.60     | 0.450 | 26  | 55 | 32 | 1             | 0.72     | 0.699 | 16 | 49 | 22      | 2       | 2.22     | 0.330 | 21  | 63 | 26 | 1       | 2.78     | 0.249 |
| s23              | 2                         | 2             | 80 | 21 | 1  | 2       | 157.67   | 0.000 | 81  | 30 | 1  | 2             | 138.43   | 0.000 | 59 | 27 | 1       | 2       | 89.85    | 0.000 | 72  | 31 | 6  | 2       | 100.19   | 0.000 |
| s24              | 2                         | 2             | 30 | 50 | 24 | 0       | 0.85     | 0.655 | 23  | 61 | 29 | 1             | 1.35     | 0.508 | 31 | 44 | 12      | 2       | 8.31     | 0.016 | 29  | 54 | 27 | 1       | 0.11     | 0.947 |
| s25              | 3                         | 2             | 29 | 54 | 21 | 0       | 1.38     | 0.500 | 19  | 64 | 30 | 1             | 4.13     | 0.127 | 14 | 52 | 21      | 2       | 4.45     | 0.108 | 21  | 62 | 27 | 1       | 2.44     | 0.296 |
| s26              | 3                         | 2             | 18 | 61 | 25 | 0       | 4.06     | 0.131 | 33  | 53 | 27 | 1             | 1.07     | 0.585 | 15 | 51 | 21      | 2       | 3.41     | 0.181 | 23  | 57 | 30 | 1       | 1.04     | 0.596 |
| s27              | 3                         | 2             | 19 | 60 | 25 | 0       | 3.15     | 0.207 | 33  | 53 | 27 | 1             | 1.07     | 0.585 | 15 | 51 | 21      | 2       | 3.41     | 0.181 | 25  | 56 | 29 | 1       | 0.33     | 0.849 |
| s28              | X                         | 1             | 49 | 0  | 54 | 1       | 0.24     | 0.622 | 50  | 63 | 0  | 1             | 1.50     | 0.221 | 55 | 0  | 32      | 2       | 6.08     | 0.014 | 0   | 50 | 60 | 1       | 0.91     | 0.340 |
| s29              | X                         | 1             | 45 | 0  | 59 | 0       | 1.88     | 0.170 | 52  | 61 | 0  | 1             | 0.72     | 0.397 | 53 | 0  | 34      | 2       | 4.15     | 0.042 | 0   | 49 | 59 | 3       | 0.93     | 0.336 |
| s30              | 3                         | 2             | 49 | 44 | 11 | 0       | 30.23    | 0.000 | 33  | 62 | 18 | 1             | 5.05     | 0.080 | 45 | 37 | 5       | 2       | 38.72    | 0.000 | 52  | 49 | 8  | 2       | 36.63    | 0.000 |
| s31              | 3                         | 2             | 28 | 53 | 23 | 0       | 0.52     | 0.771 | 21  | 68 | 23 | 2             | 5.21     | 0.074 | 20 | 41 | 26      | 2       | 1.11     | 0.573 | 24  | 54 | 32 | 1       | 1.20     | 0.549 |
| s32              | 3                         | 2             | 30 | 50 | 22 | 0       | 1.23     | 0.540 | 22  | 57 | 34 | 1             | 2.56     | 0.278 | 21 | 43 | 23      | 2       | 0.10     | 0.950 | 19  | 58 | 33 | 1       | 3.89     | 0.143 |
| s33              | X                         | 1             | 50 | 0  | 54 | 0       | 0.15     | 0.695 | 55  | 58 | 0  | 1             | 0.08     | 0.778 | 49 | 0  | 38      | 2       | 1.39     | 0.238 | 0   | 50 | 60 | 1       | 0.91     | 0.340 |
| s34              | 2                         | 2             | 81 | 18 | 5  | 0       | 155.54   | 0.000 | 84  | 24 | 5  | 1             | 147.85   | 0.000 | 62 | 25 | 0       | 2       | 104.10   | 0.000 | 75  | 34 | 1  | 1       | 115.60   | 0.000 |
| s35              | 3                         | 2             | 47 | 49 | 7  | 1       | 31.31    | 0.000 | 53  | 51 | 8  | 2             | 37.05    | 0.000 | 25 | 48 | 14      | 2       | 3.71     | 0.156 | 36  | 55 | 19 | 1       | 5.25     | 0.072 |
| s36              | Invariant                 | 104           | 0  | 0  | 0  | 0       |          |       | 113 | 0  | 0  | 1             |          |       | 87 | 0  | 0       | 2       |          |       | 110 | 0  | 0  | 1       |          |       |
| s37              | Invariant                 | 104           | 0  | 0  | 0  | 0       |          |       | 112 | 0  | 0  | 2             |          |       | 87 | 0  | 0       | 2       |          |       | 109 | 0  | 0  | 2       |          |       |
| s38              | 3                         | 2             | 30 | 53 | 20 | 1       | 2.03     | 0.363 | 19  | 64 | 30 | 1             | 4.13     | 0.127 | 16 | 48 | 23      | 2       | 2.06     | 0.357 | 21  | 64 | 25 | 1       | 3.24     | 0.198 |
| s39              | 2                         | 2             | 28 | 53 | 23 | 0       | 0.52     | 0.771 | 32  | 55 | 26 | 1             | 0.72     | 0.699 | 33 | 40 | 14      | 2       | 8.86     | 0.012 | 31  | 58 | 21 | 1       | 2.15     | 0.342 |
| s40              | X                         | 1             | 46 | 0  | 58 | 0       | 1.38     | 0.239 | 49  | 64 | 0  | 1             | 1.99     | 0.158 | 50 | 0  | 37      | 2       | 1.94     | 0.163 | 0   | 50 | 59 | 2       | 0.74     | 0.389 |
| s41              | 2                         | 2             | 26 | 55 | 23 | 0       | 0.52     | 0.771 | 31  | 56 | 26 | 1             | 0.45     | 0.798 | 28 | 44 | 15      | 2       | 3.90     | 0.143 | 29  | 56 | 25 | 1       | 0.33     | 0.849 |
| s42              | 2                         | 2             | 80 | 18 | 6  | 0       | 149.77   | 0.000 | 84  | 24 | 5  | 1             | 147.85   | 0.000 | 53 | 32 | 2       | 2       | 65.87    | 0.000 | 59  | 50 | 1  | 1       | 62.07    | 0.000 |
| s43              | 3                         | 2             | 24 | 54 | 26 | 0       | 0.23     | 0.891 | 32  | 53 | 28 | 1             | 0.72     | 0.699 | 15 | 53 | 19      | 2       | 4.52     | 0.104 | 21  | 56 | 33 | 1       | 2.65     | 0.265 |
| s44              | 4                         | 2             | 29 | 54 | 21 | 0       | 1.38     | 0.500 | 27  | 58 | 27 | 2             | 0.14     | 0.931 | 22 | 49 | 16      | 2       | 2.22     | 0.330 | 17  | 63 | 30 | 1       | 5.40     | 0.067 |
| s45              | 3                         | 2             | 31 | 51 | 22 | 0       | 1.60     | 0.450 | 24  | 56 | 33 | 1             | 1.44     | 0.486 | 19 | 48 | 20      | 2       | 0.95     | 0.621 | 20  | 62 | 28 | 1       | 2.95     | 0.229 |
| s46              | 3                         | 2             | 28 | 56 | 20 | 0       | 1.85     | 0.397 | 21  | 60 | 31 | 2             | 2.36     | 0.308 | 16 | 47 | 24      | 2       | 2.03     | 0.362 | 20  | 64 | 24 | 3       | 4.00     | 0.135 |
| s47              | 3                         | 2             | 29 | 52 | 21 | 2       | 1.29     | 0.524 | 19  | 65 | 29 | 1             | 4.33     | 0.115 | 15 | 50 | 22      | 2       | 3.07     | 0.216 | 21  | 64 | 25 | 1       | 3.24     | 0.198 |
| s48              | 3                         | 2             | 23 | 54 | 27 | 0       | 0.46     | 0.794 | 31  | 54 | 28 | 1             | 0.38     | 0.827 | 17 | 53 | 16      | 3       | 4.67     | 0.097 | 27  | 56 | 24 | 4       | 0.40     | 0.818 |
| s49              | 2                         | 2             | 30 | 53 | 21 | 0       | 1.60     | 0.450 | 24  | 62 | 27 | 1             | 1.23     | 0.541 | 30 | 44 | 12      | 3       | 7.58     | 0.023 | 31  | 53 | 26 | 1       | 0.60     | 0.741 |
| s50              | 2                         | 2             | 32 | 51 | 21 | 0       | 2.37     | 0.306 | 33  | 59 | 21 | 1             | 2.77     | 0.250 | 36 | 43 | 8       | 2       | 18.03    | 0.000 | 44  | 49 | 17 | 1       | 14.56    | 0.001 |
| s51              | X                         | 1             | 61 | 0  | 42 | 1       | 3.50     | 0.061 | 54  | 58 | 0  | 2             | 0.14     | 0.705 | 50 | 0  | 37      | 2       | 1.94     | 0.163 | 0   | 50 | 59 | 2       | 0.74     | 0.389 |
| s52              | 2                         | 2             | 29 | 55 | 20 | 0       | 1.90     | 0.386 | 27  | 61 | 25 | 1             | 0.79     | 0.674 | 25 | 49 | 13      | 2       | 4.70     | 0.095 | 26  | 58 | 26 | 1       | 0.33     | 0.849 |
| s53              | 2                         | 2             | 27 | 50 | 26 | 1       | 0.11     | 0.948 | 33  | 52 | 28 | 1             | 1.16     | 0.560 | 34 | 36 | 17      | 2       | 9.23     | 0.010 | 33  | 50 | 27 | 1       | 1.56     | 0.458 |
| s54              | 2                         | 2             | 36 | 44 | 24 | 0       | 5.23     | 0.073 | 30  | 61 | 22 | 1             | 1.85     | 0.397 | 33 | 39 | 15      | 2       | 8.38     | 0.015 | 27  | 56 | 25 | 3       | 0.22     | 0.895 |
| s55              | X                         | 1             | 58 | 0  | 46 | 0       | 1.38     | 0.239 | 52  | 61 | 0  | 1             | 0.72     | 0.397 | 50 | 0  | 37      | 2       | 1.94     | 0.163 | 0   | 54 | 54 | 3       | 0.00     | 1.000 |
| s56              | 2                         | 2             | 30 | 53 | 21 | 0       | 1.60     | 0.450 | 33  | 58 | 22 | 1             | 2.22     | 0.329 | 33 | 43 | 13      | 0       | 9.09     | 0.011 | 39  | 53 | 18 | 1       | 8.16     | 0.017 |
| s57              | 2                         | 2             | 24 | 56 | 24 | 0       | 0.62     | 0.735 | 30  | 59 | 24 | 1             | 0.86     | 0.651 | 26 | 46 | 17      | 0       | 1.92     | 0.383 | 29  | 56 | 25 | 1       | 0.33     | 0.849 |
| s58              | 2                         | 2             | 44 | 42 | 15 | 3       | 19.51    | 0.000 | 35  | 62 | 11 | 5             | 13.04    | 0.001 | 37 | 41 | 9       | 2       | 18.31    | 0.000 | 42  | 49 | 11 | 9       | 19.00    | 0.000 |
| s59              | 2                         | 2             | 58 | 37 | 9  | 0       | 54.83    | 0.0   |     |    |    |               |          |       |    |    |         |         |          |       |     |    |    |         |          |       |

**Table S3 Order of genetic markers along the chromosomes of *Drosophila* species.** The locations of sequence orthologous to those used for the *D. serrata* physical map were found for the *Drosophila* species previously sequenced in the 12 Genomes Project (Shaeffer et al. 2008) by a manual search on Flybase. The genes are ordered according to their relative positions along the chromosome arms. Spacing between genes in this table is not proportional to their spacing in the genome. The *D. melanogaster* region numbers for each chromosome were used to orient the marker sequences in melanogaster group species and also in *D. serrata*, which has the same region numbering order of its chromosome arms as *D. melanogaster*. The CG numbers for *D. melanogaster* were used in the comparisons. The centromeres are indicated by black boxes and fixed inversions between related species are outlined in black. Translocations/ transpositions are also outlined in black.

Table S3 is available for download at <http://www.g3journal.org/lookup/suppl/doi:10.1534/g3.111.001354/-/DC1> as an Excel file.

**File S1 F2 SNP Data Mapmaker Format**

File S1 is available for download at <http://www.g3journal.org/lookup/suppl/doi:10.1534/g3.111.001354/-/DC1> as a zip file.
