# Supplementary material for: Physical and Linkage Maps for Drosophila serrata, a Model Species for Studies of Clinal Adaptation and Sexual Selection
Source: PubMed Central journal article supplement (PMC3284336; doi:10.1534/g3.111.001354), 2012-02-01
Supplement: supp_2.2.287_TableS1.pdf [file supp_2.2.287_TableS1.pdf]

**Table S1 Comparative Gene Locations in *D. melanogaster* and *D. serrata*****Chromosome X (Muller element A)**

| Gene                                                  | Dm Flybase code  | <i>D. mel</i> location | <i>D. serrata</i> location |
|-------------------------------------------------------|------------------|------------------------|----------------------------|
| SNP s55<br>stubarista (sta)                           | CG14792          | X2B1                   | X2B                        |
| Ds CL472Contig1<br>protein coding gene                | CG8128           | X13E7-8                | X5A                        |
| ATP7                                                  | CG1886           | X10F1-2                | X5B                        |
| lethal(1) G0196<br>(l(1) G0196)                       | CG14616          | X20C1                  | X5D (~same as stn A)       |
| stoned A (stn A)                                      | CG12500          | X20F3                  | X5D (prox to 14616)        |
| <b>Actin (Act5C)</b>                                  | <b>CG4027</b>    | <b>X5C7</b>            | <b>X6C</b>                 |
| SNP s33<br>yolkless (yl)                              | CG1372           | X12E3                  | X7A                        |
| Ds CL1017Contig1<br>CHOp24                            | CG3564           | X4C7                   | X8D                        |
| Ds CL49Contig1<br>Autophagy specif<br>Gene 8a (Atg8a) | CG32672          | X9E6-7                 | X11E                       |
| SNP s29<br>protein coding gene                        | CG14235          | X18E5                  | X12C                       |
| Ds CL0Est<br>annexin (AnnX)<br>white (w)              | CG9579<br>CG2759 | X19C1<br>X3B6          | X14B<br>X15A(from pUAST)   |

**Chromosome Dm 2L (Muller element B)**

| Gene                                                           | Dm Flybase code | Dm Location | Ds location |
|----------------------------------------------------------------|-----------------|-------------|-------------|
| Ds Clone4994573C12<br>protein coding gene                      | CG17633         | 2L~30C8     | 2L24A       |
| synthesis of cyto-<br>chrome c oxidase (sco1)                  | CG8885          | 2L25B5      | 2L25A       |
| synaptotagmin1<br>(Syt 1)                                      | CG3139          | 2L23A6-B1   | 2L25C       |
| SNP s53<br>Glycerol-3-phosphate<br>dehydrogenase (Gpdh)        | CG9042          | 2L26A3      | 2L26A       |
| Ds Clone4952873C05<br>Imaginal disc growth<br>factor 1 (Idgf1) | CG4472          | 2L36A1      | 2L33C       |

|                                                                         |         |        |       |
|-------------------------------------------------------------------------|---------|--------|-------|
| donut (dnt)                                                             | CG17559 | 2L37D2 | 2L35B |
| Ds Clone4982073E19<br>Larval serum protein<br>1 $\beta$ (Lsp1 $\beta$ ) | CG4178  | 2L21E2 | 2L35C |
| SNP s56<br>Eukaryote initiation factor<br>4a (eIF-4a)                   | CG9075  | 2L26B2 | 2L36B |
| black (b)                                                               | CG7811  | 2L34D1 | 2L39C |

### Chromosome 2R (Muller element C)

| Gene                                                         | Dm Flybase code | Dm Location     | Ds location           |
|--------------------------------------------------------------|-----------------|-----------------|-----------------------|
| <b>Actin (Act42A)</b>                                        | <b>CG12051</b>  | <b>2R42A7</b>   | <b>2R41A</b>          |
| Ds CL589Contig1<br>Heat shock protein<br>cognate 5 (Hsc70-5) | CG8542          | 2R50E6          | 2R44B                 |
| protein coding gene                                          | CG8740          | 2R44E3-4        | 2R44B                 |
| SNP s4 $\beta$ tubulin 60D*<br>( $\beta$ Tub60D)             | CG3401          | 2R60C6          | 2R45A                 |
| SNP s52 Muscle<br>protein 20 (Mp20)                          | CG4696          | 2R49F13         | 2R45A                 |
| Ds CL1086Contig1<br>protein coding gene                      | CG8736          | 2R44D4          | 2R45C                 |
| Ribosomal protein<br>LP2 (RplP2)                             | CG4918          | 2R53C9          | 2R46A                 |
| <b><math>\beta</math> tubulin (<math>\beta</math>Tub56D)</b> | <b>CG9277</b>   | <b>2R56D7-8</b> | <b>2R47B</b>          |
| trplike (trpl)                                               | CG18345         | 2R46B2          | 2R48B                 |
| even skipped (eve)                                           | CG2328          | 2R46C10         | 2R49A                 |
| <b>Actin (Act57B)</b>                                        | <b>CG10067</b>  | <b>2R57B5</b>   | <b>2R50B</b>          |
| morula (mr)                                                  | CG3060          | 2R60A4          | 2R53A                 |
| Ds CL388Contig1<br>protein coding gene                       | CG4019          | 2R59F4          | 2R56C                 |
| engrailed (en)                                               | CG9015          | 2R47F17         | 2R57C                 |
| Ds CL1069Contig1<br>Trehalose transporter 1-1<br>Tret1-1     | CG30035         | 2R48B6-7        | 2R57D                 |
| Ds CL1004Contig1<br>protein coding gene                      | CG12736         | 2R43D1          | 2R59A                 |
| kruppel (kr)                                                 | CG3340          | 2R60F6          | 2R60C (near telomere) |

**Chromosome 3L (Muller element D)**

| Gene                                               | Dm Flybase code | Dm Location       | Ds location  |
|----------------------------------------------------|-----------------|-------------------|--------------|
| protein coding gene                                | CG7376          | 3L65A5            | 3L61C        |
| <i>ecdy. induced prot. (Eip74EF)</i>               | <i>CG32180</i>  | <i>3L74D4-E2</i>  | <i>3L62B</i> |
| SNP s26, Catalase (Cat)                            | CG6871          | 3L75E1            | 3L62C        |
| Ds CL230(203?)Contig1 protein coding gene          | CG3819          | 3L75E6            | 3L63B        |
| Ds CL159Contig1, UDP-galactose 4'-epimerase (Gale) | CG12030         | 3L61C8            | 3L65A        |
| Ds CL265Contig1 protein coding gene                | CG14997         | 3L64A10           | 3L65C        |
| <i>ecdy. induced prot. (Eip75B)</i>                | <i>CG8127</i>   | <i>3L75A10-B6</i> | <i>3L67C</i> |
| <i>heat shock prot. 83 (Hsp83)</i>                 | <i>CG1242</i>   | <i>3L63B11</i>    | <i>3L68D</i> |
| knirps (kni)                                       | CG4717          | 3L77E3            | 3L71B        |
| <i>Actin (Act79B)</i>                              | <i>CG7478</i>   | <i>3L79B</i>      | <i>3L72</i>  |
| SNP s47, ATP synthase, subunit b ATPsyn-b          | CG8189          | 3L67C5            | 3L74C        |
| <i>eukar init. Factor 4E (eIF-4E)</i>              | <i>CG4035</i>   | <i>3L67B4</i>     | <i>3L75B</i> |
| Ds CL231Contig1 Astray (aay)                       | CG3705          | 3L67B5            | 3L75C        |
| <i>α tubulin (αTub67C)</i>                         | <i>CG8308</i>   | <i>3L67C4</i>     | <i>3L75C</i> |
| Ds CL920Contig1 tumor sup prot 101 (TSG101)        | CG9712          | 3L73D1            | 3L76A        |

**Chromosome 3R (Muller element E)**

| Gene                                | Dm Flybase code | Dm Location  | Ds location |
|-------------------------------------|-----------------|--------------|-------------|
| Ds CL0EstAφ4 Regena (Rga)           | CG2161          | 3R83B5-6     | 3R81A       |
| Senescence marker prot. 30 (smp-30) | CG7390          | 3R88D2       | 3R82D       |
| <i>Actin (Act88F)</i>               | <i>CG5178</i>   | <i>3R88F</i> | <i>3R83</i> |
| hunchback (hb)                      | CG9786          | 3R85A5       | 3R83D       |

|                                                  |                          |                     |                        |
|--------------------------------------------------|--------------------------|---------------------|------------------------|
| $\alpha$ tubulin ( $\alpha$ Tub85E)              | CG9476                   | 3R85E6              | 3R84A                  |
| Heat shock RNAw (Hsrw)                           | CR31400                  | 3R93D4              | 3R84A                  |
| SNP s20, Ribosomal Protein L4 (RpL4)             | CG5502                   | 3R98B6              | 3R85B                  |
| Ds CL0EstO $\phi$ 3 Elongin B (Elongin-B)        | CG4204                   | 3R92F2              | 3R86A                  |
| Glutamate de-hydrogenase (Gdh)                   | CG5320                   | 3R95C13-D1          | 3R86C                  |
| Heat shock prot. 68 (Hsp68)                      | CG5436                   | 3R95D11             | 3R86                   |
| Antennapedia (Antp)                              | CG1028                   | 3R84A6              | 3R87C                  |
| $\alpha$ tubulin ( $\alpha$ Tub84B)              | CG1913                   | 3R84B2              | 3R87D                  |
| $\alpha$ tubulin ( $\alpha$ Tub84D)              | CG2512                   | 3R84D9              | 3R87D                  |
| Actin (Act88F)                                   | CG5178                   | 3R88F               | 3R88                   |
| Ds CL533Contig1 myosin alk lite ch (Mlc1)        | CG5596                   | 3R98A14-15          | 3R89C                  |
| $\beta$ tubulin ( $\beta$ Tub85D)                | CG9359                   | 3R85D15             | 3R92                   |
| transient receptor potential (trp)               | CG7875                   | 3R99C6-G7           | 3R93A                  |
| $\beta$ tubulin ( $\beta$ Tub97EF)               | CG4869                   | 3R98B6-7            | 3R93                   |
| Heat shock prot. 70 (Hsp70)                      | 5, depends on probe used | 3R87A2-3/<br>B12-15 | 3R94                   |
| Actin (Act87E)                                   | CG18290                  | 3R87E               | 3R95D                  |
| globin1 (glob1)                                  | CG9734                   | 3R89A8              | 3R96A                  |
| Ds CL22Contig1 Aldolase (Ald)                    | CG6058                   | 3R97A6              | 3R96B                  |
| SNP s7, Ferritin 1 heavy chain homolog (Fer1HCH) | CG2216                   | 3R99F2              | 3R97B                  |
| Ribosomal protein L32 (rp49, RpL32)              | CG7939                   | 3R99D3              | 3R100D (near telomere) |

---

#### Chromosome 4 (Dm 4) (Muller element F)

---

| Gene                                  | Dm Flybase code | Dm Location | Ds location |
|---------------------------------------|-----------------|-------------|-------------|
| Plasma membrane Calcium ATPase (PMCA) | CG42314         | (4)102B     | (4)102A     |

---
