# Supplementary material for: Physical and Linkage Maps for Drosophila serrata, a Model Species for Studies of Clinal Adaptation and Sexual Selection
Source: PubMed Central journal article supplement (PMC3284336; doi:10.1534/g3.111.001354), 2012-02-01
Supplement: supp_2.2.287_TableS2.pdf [file supp_2.2.287_TableS2.pdf]

Table S2

| Reciprocal cross |                                 | CTN42 x FORS4 |    |    |    |         |          |       |     |    |    | FORS4 x CTN42 |          |       |    |    |         |         |          |       |     |    |    |         |          |       |
|------------------|---------------------------------|---------------|----|----|----|---------|----------|-------|-----|----|----|---------------|----------|-------|----|----|---------|---------|----------|-------|-----|----|----|---------|----------|-------|
| Sex              |                                 | Males         |    |    |    |         | Females  |       |     |    |    | Males         |          |       |    |    | Females |         |          |       |     |    |    |         |          |       |
| SNP Marker       | <i>D. serrata</i> linkage group | d.f.          | a  | h  | b  | missing | $\chi^2$ | p     | a   | h  | b  | missing       | $\chi^2$ | p     | a  | h  | b       | missing | $\chi^2$ | p     | a   | h  | b  | missing | $\chi^2$ | p     |
|                  |                                 |               |    |    |    |         |          |       |     |    |    |               |          |       |    |    |         |         |          |       |     |    |    |         |          |       |
| s2               | X                               | 1             | 45 | 0  | 59 | 0       | 1.88     | 0.170 | 54  | 59 | 0  | 1             | 0.22     | 0.638 | 42 | 0  | 45      | 2       | 0.10     | 0.748 | 0   | 54 | 53 | 4       | 0.01     | 0.923 |
| s3               | 3                               | 2             | 47 | 42 | 15 | 0       | 23.54    | 0.000 | 40  | 55 | 18 | 1             | 8.65     | 0.013 | 32 | 45 | 10      | 2       | 11.23    | 0.004 | 33  | 60 | 17 | 1       | 5.56     | 0.062 |
| s4               | 2                               | 2             | 29 | 54 | 20 | 1       | 1.82     | 0.403 | 27  | 61 | 25 | 1             | 0.79     | 0.674 | 26 | 48 | 13      | 2       | 4.82     | 0.090 | 24  | 59 | 27 | 1       | 0.75     | 0.689 |
| s5               | 3                               | 2             | 24 | 51 | 23 | 6       | 0.18     | 0.912 | 20  | 51 | 35 | 7             | 4.40     | 0.111 | 18 | 42 | 23      | 6       | 0.61     | 0.735 | 12  | 50 | 34 | 15      | 10.25    | 0.006 |
| s6               | 2                               | 2             | 28 | 50 | 25 | 1       | 0.26     | 0.877 | 33  | 52 | 28 | 1             | 1.16     | 0.560 | 34 | 39 | 14      | 2       | 10.13    | 0.006 | 42  | 44 | 24 | 1       | 10.29    | 0.006 |
| s7               | 3                               | 2             | 49 | 43 | 11 | 1       | 30.84    | 0.000 | 33  | 62 | 18 | 1             | 5.05     | 0.080 | 45 | 37 | 5       | 2       | 38.72    | 0.000 | 54  | 48 | 8  | 1       | 40.25    | 0.000 |
| s8               | 2                               | 2             | 25 | 53 | 26 | 0       | 0.06     | 0.972 | 29  | 56 | 28 | 1             | 0.03     | 0.987 | 30 | 42 | 15      | 2       | 5.28     | 0.072 | 33  | 50 | 27 | 1       | 1.56     | 0.458 |
| s9               | 2                               | 2             | 72 | 26 | 6  | 0       | 109.77   | 0.000 | 75  | 34 | 4  | 1             | 107.14   | 0.000 | 47 | 32 | 8       | 2       | 41.05    | 0.000 | 51  | 47 | 12 | 1       | 29.98    | 0.000 |
| s10              | Invariant                       | 104           | 0  | 0  | 0  | 0       |          |       | 113 | 0  | 0  | 1             |          |       | 87 | 0  | 0       | 2       |          |       | 110 | 0  | 0  | 1       |          |       |
| s11              | 2                               | 2             | 78 | 25 | 1  | 0       | 142.06   | 0.000 | 93  | 20 | 0  | 1             | 200.24   | 0.000 | 72 | 15 | 0       | 2       | 156.52   | 0.000 | 85  | 25 | 0  | 1       | 164.09   | 0.000 |
| s12              | 2                               | 2             | 62 | 17 | 25 | 0       | 73.44    | 0.000 | 82  | 6  | 25 | 1             | 147.78   | 0.000 | 64 | 8  | 15      | 2       | 113.14   | 0.000 | 71  | 14 | 25 | 1       | 99.60    | 0.000 |
| s13              | 3                               | 2             | 28 | 51 | 19 | 6       | 1.82     | 0.403 | 20  | 62 | 22 | 9             | 3.92     | 0.141 | 15 | 38 | 26      | 10      | 3.18     | 0.204 | 22  | 45 | 26 | 18      | 0.44     | 0.802 |
| s14              | 3                               | 2             | 30 | 53 | 21 | 0       | 1.60     | 0.450 | 26  | 53 | 34 | 1             | 1.57     | 0.457 | 17 | 49 | 21      | 2       | 1.76     | 0.415 | 20  | 66 | 24 | 1       | 4.69     | 0.096 |
| s15              | 3                               | 2             | 66 | 17 | 18 | 3       | 90.07    | 0.000 | 62  | 17 | 32 | 3             | 69.63    | 0.000 | 54 | 15 | 13      | 7       | 73.98    | 0.000 | 68  | 11 | 29 | 3       | 96.65    | 0.000 |
| s16              | 2                               | 2             | 27 | 54 | 23 | 0       | 0.46     | 0.794 | 32  | 54 | 27 | 1             | 0.66     | 0.718 | 32 | 40 | 14      | 3       | 7.95     | 0.019 | 30  | 56 | 21 | 4       | 1.75     | 0.417 |
| s17              | 3                               | 2             | 28 | 56 | 20 | 0       | 1.85     | 0.397 | 21  | 61 | 31 | 1             | 2.49     | 0.288 | 15 | 49 | 23      | 2       | 2.86     | 0.239 | 22  | 65 | 23 | 1       | 3.65     | 0.161 |
| s18              | 2                               | 2             | 39 | 53 | 12 | 0       | 14.06    | 0.001 | 45  | 61 | 7  | 1             | 26.27    | 0.000 | 39 | 38 | 10      | 2       | 20.72    | 0.000 | 48  | 45 | 17 | 1       | 21.11    | 0.000 |
| s19              | 2                               | 2             | 33 | 48 | 23 | 0       | 2.54     | 0.281 | 24  | 63 | 26 | 1             | 1.57     | 0.457 | 32 | 42 | 13      | 2       | 8.40     | 0.015 | 30  | 55 | 25 | 1       | 0.45     | 0.797 |
| s20              | 3                               | 2             | 23 | 58 | 21 | 2       | 2.00     | 0.368 | 22  | 68 | 22 | 2             | 5.14     | 0.076 | 17 | 42 | 26      | 4       | 1.92     | 0.383 | 25  | 54 | 29 | 3       | 0.30     | 0.862 |
| s21              | 2                               | 2             | 36 | 50 | 18 | 0       | 6.38     | 0.041 | 40  | 54 | 19 | 1             | 8.03     | 0.018 | 39 | 40 | 8       | 2       | 22.66    | 0.000 | 48  | 50 | 12 | 1       | 24.47    | 0.000 |
| s22              | 3                               | 2             | 31 | 51 | 22 | 0       | 1.60     | 0.450 | 26  | 55 | 32 | 1             | 0.72     | 0.699 | 16 | 49 | 22      | 2       | 2.22     | 0.330 | 21  | 63 | 26 | 1       | 2.78     | 0.249 |
| s23              | 2                               | 2             | 80 | 21 | 1  | 2       | 157.67   | 0.000 | 81  | 30 | 1  | 2             | 138.43   | 0.000 | 59 | 27 | 1       | 2       | 89.85    | 0.000 | 72  | 31 | 6  | 2       | 100.19   | 0.000 |
| s24              | 2                               | 2             | 30 | 50 | 24 | 0       | 0.85     | 0.655 | 23  | 61 | 29 | 1             | 1.35     | 0.508 | 31 | 44 | 12      | 2       | 8.31     | 0.016 | 29  | 54 | 27 | 1       | 0.11     | 0.947 |
| s25              | 3                               | 2             | 29 | 54 | 21 | 0       | 1.38     | 0.500 | 19  | 64 | 30 | 1             | 4.13     | 0.127 | 14 | 52 | 21      | 2       | 4.45     | 0.108 | 21  | 62 | 27 | 1       | 2.44     | 0.296 |
| s26              | 3                               | 2             | 18 | 61 | 25 | 0       | 4.06     | 0.131 | 33  | 53 | 27 | 1             | 1.07     | 0.585 | 15 | 51 | 21      | 2       | 3.41     | 0.181 | 23  | 57 | 30 | 1       | 1.04     | 0.596 |
| s27              | 3                               | 2             | 19 | 60 | 25 | 0       | 3.15     | 0.207 | 33  | 53 | 27 | 1             | 1.07     | 0.585 | 15 | 51 | 21      | 2       | 3.41     | 0.181 | 25  | 56 | 29 | 1       | 0.33     | 0.849 |
| s28              | X                               | 1             | 49 | 0  | 54 | 1       | 0.24     | 0.622 | 50  | 63 | 0  | 1             | 1.50     | 0.221 | 55 | 0  | 32      | 2       | 6.08     | 0.014 | 0   | 50 | 60 | 1       | 0.91     | 0.340 |
| s29              | X                               | 1             | 45 | 0  | 59 | 0       | 1.88     | 0.170 | 52  | 61 | 0  | 1             | 0.72     | 0.397 | 53 | 0  | 34      | 2       | 4.15     | 0.042 | 0   | 49 | 59 | 3       | 0.93     | 0.336 |
| s30              | 3                               | 2             | 49 | 44 | 11 | 0       | 30.23    | 0.000 | 33  | 62 | 18 | 1             | 5.05     | 0.080 | 45 | 37 | 5       | 2       | 38.72    | 0.000 | 52  | 49 | 8  | 2       | 36.63    | 0.000 |
| s31              | 3                               | 2             | 28 | 53 | 23 | 0       | 0.52     | 0.771 | 21  | 68 | 23 | 2             | 5.21     | 0.074 | 20 | 41 | 26      | 2       | 1.11     | 0.573 | 24  | 54 | 32 | 1       | 1.20     | 0.549 |
| s32              | 3                               | 2             | 30 | 50 | 22 | 0       | 1.23     | 0.540 | 22  | 57 | 34 | 1             | 2.56     | 0.278 | 21 | 43 | 23      | 2       | 0.10     | 0.950 | 19  | 58 | 33 | 1       | 3.89     | 0.143 |
| s33              | X                               | 1             | 50 | 0  | 54 | 0       | 0.15     | 0.695 | 55  | 58 | 0  | 1             | 0.08     | 0.778 | 49 | 0  | 38      | 2       | 1.39     | 0.238 | 0   | 50 | 60 | 1       | 0.91     | 0.340 |
| s34              | 2                               | 2             | 81 | 18 | 5  | 0       | 155.54   | 0.000 | 84  | 24 | 5  | 1             | 147.85   | 0.000 | 62 | 25 | 0       | 2       | 104.10   | 0.000 | 75  | 34 | 1  | 1       | 115.60   | 0.000 |
| s35              | 3                               | 2             | 47 | 49 | 7  | 1       | 31.31    | 0.000 | 53  | 51 | 8  | 2             | 37.05    | 0.000 | 25 | 48 | 14      | 2       | 3.71     | 0.156 | 36  | 55 | 19 | 1       | 5.25     | 0.072 |
| s36              | Invariant                       | 104           | 0  | 0  | 0  | 0       |          |       | 113 | 0  | 0  | 1             |          |       | 87 | 0  | 0       | 2       |          |       | 110 | 0  | 0  | 1       |          |       |
| s37              | Invariant                       | 104           | 0  | 0  | 0  | 0       |          |       | 112 | 0  | 0  | 2             |          |       | 87 | 0  | 0       | 2       |          |       | 109 | 0  | 0  | 2       |          |       |
| s38              | 3                               | 2             | 30 | 53 | 20 | 1       | 2.03     | 0.363 | 19  | 64 | 30 | 1             | 4.13     | 0.127 | 16 | 48 | 23      | 2       | 2.06     | 0.357 | 21  | 64 | 25 | 1       | 3.24     | 0.198 |
| s39              | 2                               | 2             | 28 | 53 | 23 | 0       | 0.52     | 0.771 | 32  | 55 | 26 | 1             | 0.72     | 0.699 | 33 | 40 | 14      | 2       | 8.86     | 0.012 | 31  | 58 | 21 | 1       | 2.15     | 0.342 |
| s40              | X                               | 1             | 46 | 0  | 58 | 0       | 1.38     | 0.239 | 49  | 64 | 0  | 1             | 1.99     | 0.158 | 50 | 0  | 37      | 2       | 1.94     | 0.163 | 0   | 50 | 59 | 2       | 0.74     | 0.389 |
| s41              | 2                               | 2             | 26 | 55 | 23 | 0       | 0.52     | 0.771 | 31  | 56 | 26 | 1             | 0.45     | 0.798 | 28 | 44 | 15      | 2       | 3.90     | 0.143 | 29  | 56 | 25 | 1       | 0.33     | 0.849 |
| s42              | 2                               | 2             | 80 | 18 | 6  | 0       | 149.77   | 0.000 | 84  | 24 | 5  | 1             | 147.85   | 0.000 | 53 | 32 | 2       | 2       | 65.87    | 0.000 | 59  | 50 | 1  | 1       | 62.07    | 0.000 |
| s43              | 3                               | 2             | 24 | 54 | 26 | 0       | 0.23     | 0.891 | 32  | 53 | 28 | 1             | 0.72     | 0.699 | 15 | 53 | 19      | 2       | 4.52     | 0.104 | 21  | 56 | 33 | 1       | 2.65     | 0.265 |
| s44              | 4                               | 2             | 29 | 54 | 21 | 0       | 1.38     | 0.500 | 27  | 58 | 27 | 2             | 0.14     | 0.931 | 22 | 49 | 16      | 2       | 2.22     | 0.330 | 17  | 63 | 30 | 1       | 5.40     | 0.067 |
| s45              | 3                               | 2             | 31 | 51 | 22 | 0       | 1.60     | 0.450 | 24  | 56 | 33 | 1             | 1.44     | 0.486 | 19 | 48 | 20      | 2       | 0.95     | 0.621 | 20  | 62 | 28 | 1       | 2.95     | 0.229 |
| s46              | 3                               | 2             | 28 | 56 | 20 | 0       | 1.85     | 0.397 | 21  | 60 | 31 | 2             | 2.36     | 0.308 | 16 | 47 | 24      | 2       | 2.03     | 0.362 | 20  | 64 | 24 | 3       | 4.00     | 0.135 |
| s47              | 3                               | 2             | 29 | 52 | 21 | 2       | 1.29     | 0.524 | 19  | 65 | 29 | 1             | 4.33     | 0.115 | 15 | 50 | 22      | 2       | 3.07     | 0.216 | 21  | 64 | 25 | 1       | 3.24     | 0.198 |
| s48              | 3                               | 2             | 23 | 54 | 27 | 0       | 0.46     | 0.794 | 31  | 54 | 28 | 1             | 0.38     | 0.827 | 17 | 53 | 16      | 3       | 4.67     | 0.097 | 27  | 56 | 24 | 4       | 0.40     | 0.818 |
| s49              | 2                               | 2             | 30 | 53 | 21 | 0       | 1.60     | 0.450 | 24  | 62 | 27 | 1             | 1.23     | 0.541 | 30 | 44 | 12      | 3       | 7.58     | 0.023 | 31  | 53 | 26 | 1       | 0.60     | 0.741 |
| s50              | 2                               | 2             | 32 | 51 | 21 | 0       | 2.37     | 0.306 | 33  | 59 | 21 | 1             | 2.77     | 0.250 | 36 | 43 | 8       | 2       | 18.03    | 0.000 | 44  | 49 | 17 | 1       | 14.56    | 0.001 |
| s51              | X                               | 1             | 61 | 0  | 42 | 1       | 3.50     | 0.061 | 54  | 58 | 0  | 2             | 0.14     | 0.705 | 50 | 0  | 37      | 2       | 1.94     | 0.163 | 0   | 50 | 59 | 2       | 0.74     | 0.389 |
| s52              | 2                               | 2             | 29 | 55 | 20 | 0       | 1.90     | 0.386 | 27  | 61 | 25 | 1             | 0.79     | 0.674 | 25 | 49 | 13      | 2       | 4.70     | 0.095 | 26  | 58 | 26 | 1       | 0.33     | 0.849 |
| s53              | 2                               | 2             | 27 | 50 | 26 | 1       | 0.11     | 0.948 | 33  | 52 | 28 | 1             | 1.16     | 0.560 | 34 | 36 | 17      | 2       | 9.23     | 0.010 | 33  | 50 | 27 | 1       | 1.56     | 0.458 |
| s54              | 2                               | 2             | 36 | 44 | 24 | 0       | 5.23     | 0.073 | 30  | 61 | 22 | 1             | 1.85     | 0.397 | 33 | 39 | 15      | 2       | 8.38     | 0.015 | 27  | 56 | 25 | 3       | 0.22     | 0.895 |
| s55              | X                               | 1             | 58 | 0  | 46 | 0       | 1.38     | 0.239 | 52  | 61 | 0  | 1             | 0.72     | 0.397 | 50 | 0  | 37      | 2       | 1.94     | 0.163 | 0   | 54 | 54 | 3       | 0.00     | 1.000 |
| s56              | 2                               | 2             | 30 | 53 | 21 | 0       | 1.60     | 0.450 | 33  | 58 | 22 | 1             | 2.22     | 0.329 | 33 | 43 | 13      | 0       | 9.09     | 0.011 | 39  | 53 | 18 | 1       | 8.16     | 0.017 |
| s57              | 2                               | 2             | 24 | 56 | 24 | 0       | 0.62     | 0.735 | 30  | 59 | 24 | 1             | 0.86     | 0.651 | 26 | 46 | 17      | 0       | 1.92     | 0.383 | 29  | 56 | 25 | 1       | 0.33     | 0.849 |
